# Supplementary material
Source: PubMed Central journal article supplement (PMC3663278)
Supplement: supp_tpc.113.111179_tpc111179Supplemental.pdf [file supp_tpc.113.111179_tpc111179Supplemental.pdf]

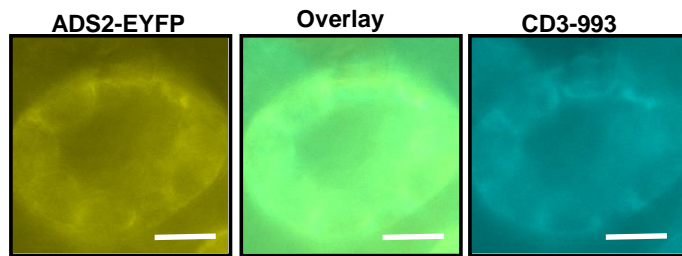

**Supplemental Figure 2. ADS2 Protein Partially Colocalize with Chloroplast Marker.**

ADS2-EYFP transiently coexpress with chloroplast marker (CD3-993) in tobacco leaves. Image was taken from leaf palisade mesophyll cell layer. Bars =10 $\mu$ m.

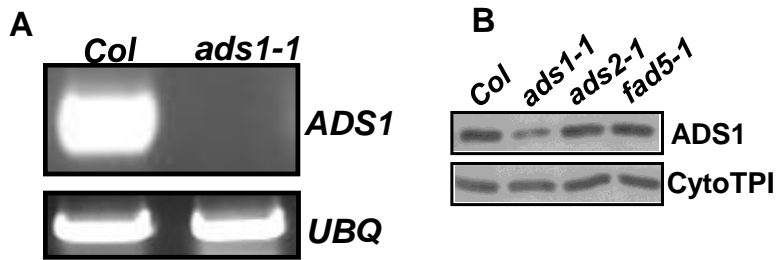

**Supplemental Figure 3. ADS1 Peptide Antibody Likely Cross React with ADS2 Protein.**

(A) RT-PCR for WT and *ads1-1* mutant, *UBQ* was used as loading control. (B) Total leaf protein were isolated from WT, *ads1-1*, *ads2-1* and *fad5-1* mutant plants, 5  $\mu$ g protein each were resolved on SDS-PAGE gel for Immuno blotting with ADS1 peptide antibody and polyclonal CytoTPI protein antibody.
